# Supplementary material
Source: ML conference proceedings conference paper supplement (https://proceedings.neurips.cc/paper_files/paper/2018/hash/cac8e13055d2e4f62b6322254203b293-Abstract.html)
Supplement: Supplementary file [file cac8e13055d2e4f62b6322254203b293-Supplemental.zip]

## Supplementary Material

### A Proof of property 1

Property 1 asserts that for given  $W$  and  $\mathbf{x}$ , for any  $G$  of same dimensionality as  $W$ , there are arbitrarily many  $(D^{(1)}, D^{(2)})$  such that  $G\mathbf{x} = D^{(2)}WD^{(1)}\mathbf{x}$ . We now prove this property:

*Proof.* Let  $\mathbf{y}^G = G\mathbf{x} = \sum_i x_i \mathbf{g}_i$ , where  $\mathbf{g}_i$  is the  $i$ th column of  $G$ . Let  $d_i^{(s)} = D_{ii}^{(s)}$  and write

$$D^{(2)}WD^{(1)}\mathbf{x} = \sum_i x_i d_i^{(1)} \begin{bmatrix} d_1^{(2)} w_{1i} \\ \vdots \\ d_m^{(2)} w_{mi} \end{bmatrix}. \quad (10)$$

Consequently, choose some  $k$  for which  $x_k \neq 0$  and set  $d_k^{(1)} = 1/x_k$ ,  $d_j^{(2)} = y_j^G/w_{jk}$ . We have

$$D^{(2)}WD^{(1)}\mathbf{x} = \frac{x_k}{x_k} \begin{bmatrix} (y_1^G/w_{1k})w_{1k} \\ \vdots \\ (y_m^G/w_{mk})w_{mk} \end{bmatrix} = \mathbf{y}^G. \quad (11)$$

Moreover, since this holds for any  $x_k \neq 0$ , every linear combination of such solutions are also solutions. ■

### B Hyper-parameters for PTB and WT2

We use tied embedding weights (Press & Wolf, 2017; Inan et al., 2017) and a weight decay rate of  $10^{-6}$ . The initial learning rate is set to 0.003 with decay rates  $\beta_1 = 0$  and  $\beta_2 = 0.999$ . The learning rate is cut after epochs 100 and 160 by a factor of 10. We use a batch size of 20 and variable truncated backpropagation through time centered at 70, as in Merity et al. (2018). Dropout rates were tuned with a coarse random search. We apply variational dropout (Gal & Ghahramani, 2016) to word and word embedding vectors, the policy latent variable, the hidden state of the aLSTM and the final aLSTM output with drop probabilities 0.16, 0.6, 0.1, 0.25, and 0.6 respectively.
